# Supplementary material
Source: PubMed Central journal article supplement (PMC10787034)
Supplement: NIHMS1918072-supplement-Supinfo.pdf [file NIHMS1918072-supplement-Supinfo.pdf]

**Supplementary Table 1.** Univariate and Multivariate Fine-Gray regression model for HG recurrence and progression to MIBC or metastatic disease using age as a continuous variable.

| Characteristic              | High-Grade Recurrence |           |         | Progression to MIBC or Metastatic Disease |           |         |
|-----------------------------|-----------------------|-----------|---------|-------------------------------------------|-----------|---------|
|                             | SHR                   | 95%CI     | p-value | SHR                                       | 95%CI     | p-value |
| <b>Age at diagnosis</b>     | 1.01                  | 0.99-1.02 | 0.16    | 1.02                                      | 0.99-1.05 | 0.10    |
| <b>BMI</b>                  |                       |           |         | 0.94                                      | 0.91-0.98 | 0.003   |
| <b>Smoker</b>               |                       |           |         |                                           |           |         |
| Never                       | 1.00                  |           | .       |                                           |           |         |
| Current/Past                | 0.76                  | 0.55-1.04 | 0.09    |                                           |           |         |
| <b>Grade</b>                |                       |           |         |                                           |           |         |
| Low                         | 1.00                  |           | .       | 1.00                                      |           | .       |
| High                        | 13.49                 | 1.8-94    | 0.01    | 3.41                                      | 0.46-25   | 0.23    |
| <b>Stage of entry TURBT</b> |                       |           |         |                                           |           |         |
| Ta                          | 1.00                  |           | .       | 1.00                                      |           | .       |
| Tis                         | 1.68                  | 0.92-3.1  | 0.09    | 1.50                                      | 0.45-4.98 | 0.5     |
| T1                          | 1.92                  | 1.35-2.75 | <0.001  | 2.94                                      | 1.5-5.47  | 0.001   |
| <b>Tumor</b>                |                       |           |         |                                           |           |         |
| Primary                     | 1.00                  |           | .       | 1.00                                      |           | .       |
| Recurrent                   | 1.69                  | 1.20-2.4  | 0.002   | 2.40                                      | 1.31-4.2  | 0.004   |
| <b>Variant Histology</b>    |                       |           |         |                                           |           |         |
| No                          | 1.00                  |           | .       |                                           |           |         |
| Yes                         | 0.50                  | 0.19-1.3  | 0.16    |                                           |           |         |
| <b>LVI</b>                  |                       |           |         |                                           |           |         |
| No                          |                       |           |         | 1.00                                      |           | .       |
| Yes                         |                       |           |         | 4.28                                      | 0.88-20   | 0.07    |
| <b>CIS in entry tumor</b>   |                       |           |         |                                           |           |         |
| No                          | 1.00                  |           | .       | 1.00                                      |           | .       |
| Yes                         | 1.16                  | 0.81-1.7  | 0.4     | 1.03                                      | 0.53-1.89 | 0.99    |
| <b>Focality</b>             |                       |           |         |                                           |           |         |
| Single                      | 1.00                  |           | .       | 1.00                                      |           | .       |
| Multiple                    | 1.18                  | 0.86-1.63 | 0.3     | 1.28                                      | 0.69-2.37 | 0.4     |

MIBC: Muscle-invasive bladder cancer; SHR: Sub-standardized Hazard ratio; CI: confident interval; BMI: Body-mass index; TURBT: Transurethral resection of the bladder; LVI: Lymphovascular invasion, CIS: carcinoma in situ.
